# Supplementary material
Source: PubMed Central journal article supplement (PMC3989641)
Supplement: embj0033-0341-sd2.pdf [file embj0033-0341-sd2.pdf]

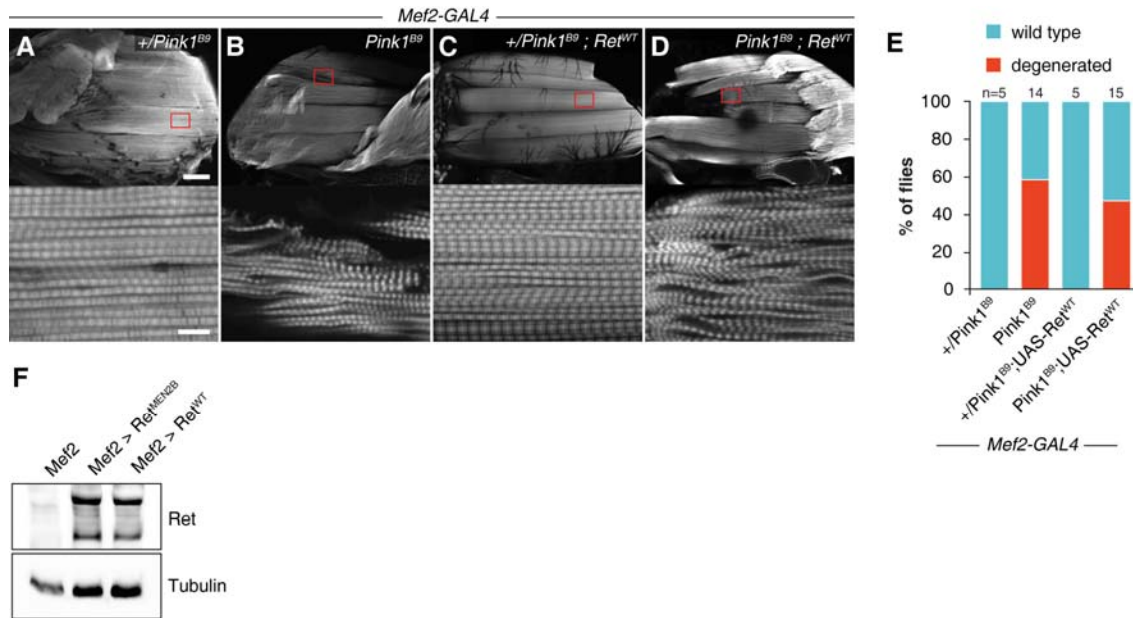

**Figure S2. No rescue of muscle degeneration by Ret<sup>WT</sup>.**

(A-D), *Drosophila* hemi-thoraces stained with phalloidin at low magnification (upper panels) showing overall IFM morphology and at higher magnification (lower panels) for assessment of myofibril and sarcomere morphologies. Overexpression of *UAS-Ret<sup>WT</sup>* under control of *Mef2-Gal4* does not modify normal muscle morphology (C) compared to controls (A). Myofibril degeneration in *Pink1* mutants (B) is not rescued by *Ret<sup>WT</sup>* overexpression (D). Scale bars, upper panel: 100  $\mu$ m, lower panels: 10  $\mu$ m. (E) Percentage of flies with phenotype “wild type” (blue) or “degenerated” (red). (F) Western blot analysis of Ret expression in thorax homogenates from *Mef2-Gal4* controls, *Mef2>Ret<sup>MEN2B</sup>* and *Mef2>Ret<sup>WT</sup>*, indicating comparable levels of overexpression of the Ret constructs, a tubulin antibody was used as loading control.
