# Supplementary material
Source: PubMed Central journal article supplement (PMC3989641)
Supplement: embj0033-0341-sd3.pdf [file embj0033-0341-sd3.pdf]

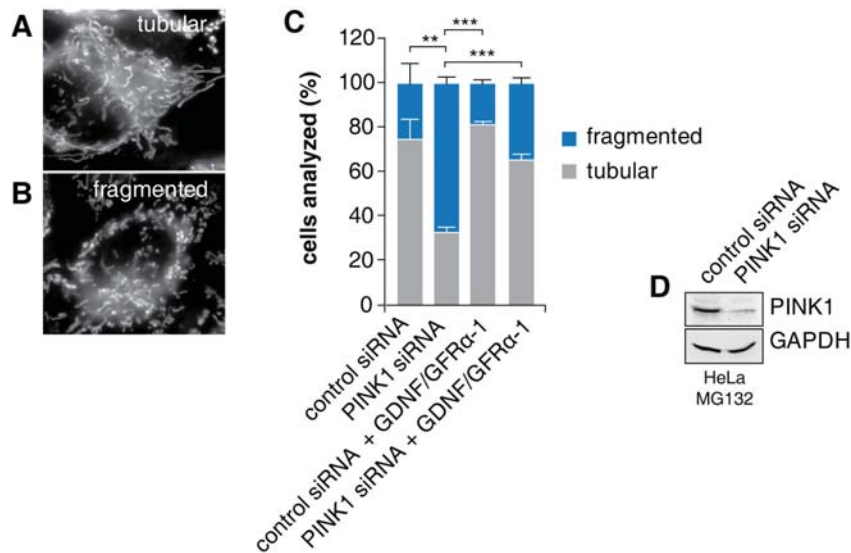

**Figure S3. GDNF/GFR $\alpha$ -1 stimulation of RET<sup>WT</sup> rescues mitochondrial fragmentation after PINK1 knockdown in HeLa cells.**

(A, B) Mitochondria of HeLa cells labeled with Mitotracker Green FM, depicting cells with typical tubular (A) and fragmented (B) morphology. (C) Quantification of mitochondrial morphology in HeLa cells transfected with Ret9 and PINK1 or scrambled siRNA and treated with GDNF/GFR $\alpha$ -1. Mitochondrial fragmentation caused by PINK1 depletion is largely rescued by GDNF/GFR $\alpha$ -1 treatment. (D) Western blot analysis depicting PINK1 knockdown efficiency in HeLa cells, treated with MG132 to prevent PINK1 degradation to boost levels GAPDH was used as loading control.
