# Supplementary material
Source: PubMed Central journal article supplement (PMC3989641)
Supplement: embj0033-0341-sd5.pdf [file embj0033-0341-sd5.pdf]

## Supplemental methods

### RT-PCR, Ret expression

3<sup>rd</sup> instar larvae, thoraces of pharate stage P11 pupae and 3 day old adult animals, or dissected IFMs of 3 day adult animals were homogenized in RLT buffer (Qiagen) using a rotor-stator homogenizer. Total RNA was prepared using the RNeasy mini kit and the QIAshredder column (Qiagen). RT-PCR analysis was performed using the OneStep RT-PCR kit (Qiagen) using 20 ng of template RNA and 40 cycles of PCR amplification. See below for list of primers.

### Fly strains

*UAS-Ret<sup>WT</sup>* was generated by reverse mutagenesis of a *UAS-Ret<sup>MEN2B</sup>* expression construct (kindly provided by Ross Cagan), after which *Ret<sup>WT</sup>* cDNA was subcloned into a pUAST\_attB vector using Sph1 and Not1, and injected into the attP40 strain according to standard procedures (Genetic Services, Inc.).

### Antibodies

For the western blot analysis, antibodies used were anti-NDUFS3 (Abcam #ab14711) and anti-Pyruvate dehydrogenase (Abcam #ab110334), anti-PINK1 (Novus Biologicals #BC100-494), anti-GAPDH (#Sigma-Aldrich G8795), panRet (provided by C. Ibanez) and alpha-Tubulin (clone DM1A, Sigma).

### Cell Culture, treatments and RNA Interference

HeLa cells (ATCC number CCL-2) were cultured and transfected for RNAi as described previously (Exner et al). PINK1 (VHS50790, Invitrogen) or medGC control siRNA oligos (Invitrogen) were transfected using Lipofectamine RNAiMAX (Invitrogen). Wt-Ret9 (kindly provided by Marc Billaud) was overexpressed using Lipofectamine 2000. For stimulation of Ret, cells were incubated with hGDNF (50ng/ml) and hGFR $\alpha$ -1 (50ng/ml) for 24 hours.

### Assessment of mitochondrial morphology

Mitochondrial morphology of HeLa cells was assessed generally as described previously (Exner et al, 2007). Briefly, Mitotracker Green FM (200 nm) (Invitrogen) was added to the cells and incubated for 15 minutes to label mitochondria. Coverslips with live cells immersed in PBS supplemented with Ca<sup>2+</sup> and Mg<sup>2+</sup> were analyzed using a Zeiss Axioplan fluorescence microscope with a 63x objective. Random fields were selected and within each field, all cells were classified and counted by the morphology of the mitochondria as “tubular” or “fragmented”.

## List PCR primers

| Primer                    | 5' to 3'                    |                        |                            |
|---------------------------|-----------------------------|------------------------|----------------------------|
| <i>Drosophila genomic</i> |                             |                        |                            |
| Pink1B9-F                 | CGACCAAATCGAATCGAAAC        | CG34089_R              | TTTCATTAGAGGCTAAAGATGTTACG |
| Pink1B9-R                 | CCAGACTAACGCCAATCAG         | CG34092_F              | ATTCGTAAAGGTCCTAATAAAGTTG  |
| Pink1-F                   | TCTGTGAGACTGCTGACCGT        | CG34439_F              | ATAATTTAATCGCATCACAAAAAGG  |
| Pink1-R                   | AAGATTCCACTGCTGCTGGT        | CG34439_R              | CCCTACAAGATGAACCGTCTTGA    |
| Park1-F                   | GTTCCCGTTTGGGCGAGCGT        | CG3446_F               | GAGAGCTCCACTGGCGAAAT       |
| Park1-R                   | CACCCAAGGCTCTGTCCCACAAT     | CG3446_R               | TTTACCCTGCCCAAGTCAG        |
| Park25-F                  | GCAAATCGGCAGCCACGCAG        | CG3621_F               | TGGTGGTGAAGCCTGTGAAG       |
| Park25-R                  | GCCTCATCCCATCGCGCCTC        | CG3621_R               | CCTGGGTGGGAGCACAAC         |
| Park-F                    | GCTGGTGTGGCAACGCGTAAG       | CG3683_F               | ATCCCGCTGGCAGTAGTAGT       |
| Park-R                    | GGTCAGCGTTTTGCCCGTGT        | CG3683_R               | AGCTGTTGTGTTGTTTTGGTTG     |
| RetcDNA-F                 | ATGCCAAGGCAGGGCAGCTG        | CG3683_R               | GCATTGCTTGCCCAATGGA        |
| RetcDNA-R                 | GTGGCAGTCGGGCCGAAACA        | CG3944_F               | AGAACATGCCCTTCGTGCTT       |
| GAL80-F                   | GGCGGTTGGTACGGCTACGA        | CG3944_R               | GGGACAGGCTTCCTGACAGA       |
| GAL80-R                   | GTCTTTGGGACTCGCTGGCCC       | CG40002_F              | GAGGAGCTATGTGGTGGTGG       |
| <i>Drosophila RT-PCR</i>  |                             |                        |                            |
| CG10320_F                 | TAAGTCAACTTACAGCAATGGGC     | CG40002_R              | TGTAACTACATGCCTACATATCGCA  |
| CG10320_R                 | ATAGCGCCAGACTTCGTTC         | CG40472_F              | GGGAAATACCGCAGTAGGCA       |
| CG11423_F                 | TATACGGACGGCAGCATTGG        | CG40472_R              | GGGGCCATTGCGGTAAGATA       |
| CG11423_R                 | AGTACCGGGCTCTCCTTCAT        | CG5548_F               | CAATTTACGATGGGCACCGC       |
| CG11455_F                 | CTTCCATGCAATGCGAAACGA       | CG5548_R               | GACTCCATCTCCTCTGGGT        |
| CG11455_R                 | GGGTCTCCGTCTAGTAGGCA        | CG5703_F               | TGGAGACCTGCAAGAAGCAG       |
| CG11752_F                 | ACCCAACACGTCCACTTTGT        | CG5703_R               | TCCTTGGATGTCAGATCCTCATAG   |
| CG11752_R                 | CACGCAATTGCTGGTCAGTC        | CG6008_F               | GCAGCTTCTACTGGCCCTAC       |
| CG11913_F                 | TCCGGTAATCATGTCTGGCG        | CG6008_R               | CGCACTTCGCATTCGCATTA       |
| CG11913_R                 | GGCTCTTCGGGGCAATCTTC        | CG6463_F               | GTGGCCCAACACAAGGACAT       |
| CG12079_F                 | GGATAAGCCCACTGTCCGC         | CG6463_R               | CTCCATGATCTGGGCTGGTG       |
| CG12079_R                 | GTACCAGTTGGCGCCTTAT         | CG6485_F               | ATGCAGTTCACGCTCAAGGA       |
| CG12203_F                 | AAGCCGATTTCTGCGGTGTA        | CG6485_R               | GGTGGTAAGTCCACCCTTGG       |
| CG12203_R                 | CTGGTACAGCTGCAGGGAGG        | CG6914_F               | AAGAAGATGCTACCGCCAA        |
| CG12400_F                 | GCTAACTGCGTTAGTTGCC         | CG6914_R               | ATGCACCTTTCCTGGAGTCG       |
| CG12400_R                 | CTTCTGGATGCCGAAACAC         | CG7598_F               | GGATGTGCTGGACAAGTGGGA      |
| CG12859_F                 | ACCTGCCAGCTGTTGCTAAA        | CG7598_R               | CGCTTAAAGGATTTCCGCACT      |
| CG12859_R                 | AATCCCGCATCGAAAACGGT        | CG7712_F               | GCTGGTCACTAAGGGCCAAA       |
| CG13240_F                 | GGAGCTGAACAACCCATCA         | CG7712_R               | AAGGACACACGCGTTTCTGA       |
| CG13240_R                 | CCTTCCGGGTCCAGTCATTC        | CG8680_F               | AGAAGTGGGCATCAAGCTC        |
| CG15434_F                 | ACAGTTTGACAACCTGCGT         | CG8680_R               | TTTCCGGGTTTGTCCAGGTT       |
| CG15434_R                 | CCACGTATTCCCTGACTCCC        | CG8844_F               | ACGAACTGCGGTCTACAAC        |
| CG18624_F                 | AAAAACGACTCGACAGCCCT        | CG8844_R               | CTCCACAATGCTCTCACGGA       |
| CG18624_R                 | CCACAGTGTCTGCTTATCCA        | CG9140_F               | CAAAGCCGACAGATTGTTGCG      |
| CG1970_F                  | AGAACCATTATAATCCGATTGCGG    | CG9140_R               | TCATCGGCATTACCACCAA        |
| CG1970_R                  | CGTCTGGATACATCACCGGG        | CG9160_F               | CAGCCAGTTGAGCCAAGAGTG      |
| CG2286_F                  | CGGTCCGGTCTGTCAAAGCAA       | CG9160_R               | CGTGGTCCAAGGAATCCAGT       |
| CG2286_R                  | GATCTGAGCAGCAGCCTGG         | CG9172_F               | GCGGTACATCATACGCATC        |
| CG3192_F                  | TGGCTGGCTGGAATAAAGGAC       | CG9172_R               | GCAGCATGTTGATCTGCTAT       |
| CG3192_R                  | CCGAGATGGGCTCGTGTG          | CG9306_F               | ATATTTTCAGGCGCAGGGCT       |
| CG3214_F                  | ACTAAGGAGGCTACTACCCC        | CG9306_R               | GTAGACATTGCGTGGTCTGT       |
| CG3214_R                  | TGTTCTTCGAGTGCAGAGTCA       | CG9762_F               | GTACGAGAAGCACCCCATCT       |
| CG32230_F                 | TCAAATCCCGAACCATGGCA        | CG9762_R               | TAAGATGATGTTGCGAAGTCGAT    |
| CG32230_R                 | AGCTTCCACAAGCTTCAAATCC      | GAPDH_F                | CAAGCAAGCCGATAGATAAAC      |
| CG34063_F                 | TCTTGGTTAGGAGCTTGAATAGGT    | GAPDH_R                | CAAGTGAGTGGATGCCTTGT       |
| CG34063_R                 | TCAAAAATGGAAAGGAGCGGC       | RetcDNA-F              | ATGCCAAGGCAGGGCAGCTG       |
| CG34076_F                 | GCTTTAATCGACCGAGA           | RetcDNA-R              | GTGGCAGTCGGGCCGAAACA       |
| CG34076_R                 | TGGATCAAATCCACATTCAA        | <i>Human RT-PCR</i>    |                            |
| CG34085_F                 | TGAAGCTCCAGTTTCTGGGT        | human PINK1_F          | CGGTCTCGCCTGTCAAGGAG       |
| CG34085_R                 | TGAGCAACAGATGAATAAGCAA      | human PINK1_R          | GCCCTGCAAGCGTCTCGTGT       |
| CG34089_F                 | TCATCCATTAGCTTTAGGATTAACCTT | human Ret_F            | CGGACATCAGCAAAGACC         |
|                           |                             | human Ret_R            | GCCGTCGTCATAAATCAGG        |
|                           |                             | human $\beta$ -actin_F | TGGACTTCGAGCAAGAGA         |
|                           |                             | human $\beta$ -actin_R | AGGAAGGAAGGCTGGAAGAG       |

## References

Exner N, Treske B, Paquet D, Holmstrom K, Schiesling C, Gispert S, Carballo-Carbajal I, Berg D, Hoepken HH, Gasser T, Kruger R, Winklhofer KF, Vogel F, Reichert AS, Auburger G, Kahle PJ, Schmid B, Haass C (2007) Loss-of-function of human PINK1 results in mitochondrial pathology and can be rescued by parkin. *The Journal of neuroscience : the official journal of the Society for Neuroscience* 27: 12413-12418
