# Supplementary material
Source: PubMed Central journal article supplement (PMC3989641)

Figure 1M source data

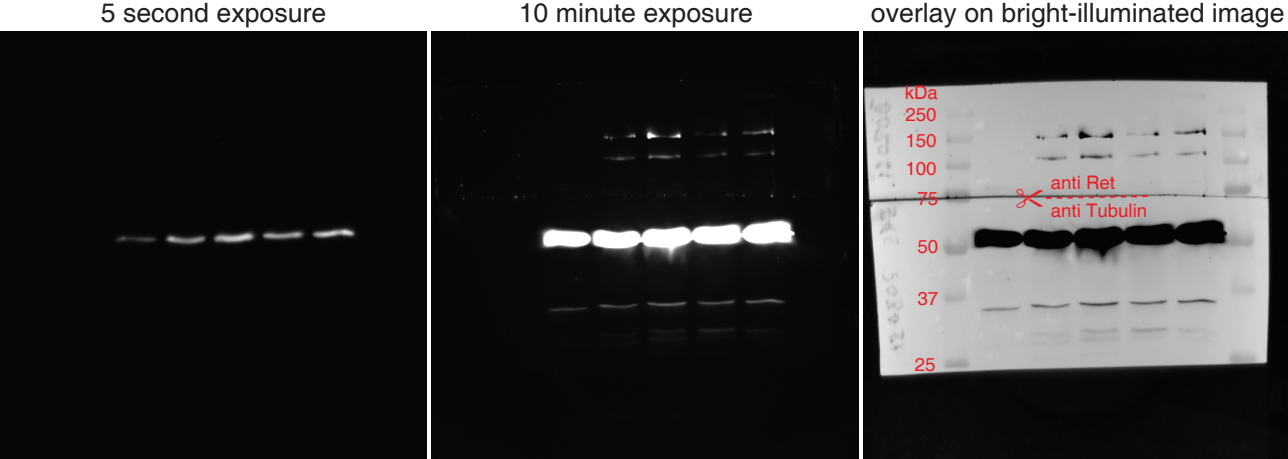

Supplement: embj0033-0341-sd7.pdf [file embj0033-0341-sd7.pdf]
